# Supplementary material for: Biorefining of Eruca sativa plant for efficient biofuel production
Source: Royal Society of Chemistry journal article supplement (doi:10.1039/c5ra27062f), 2016-01-01
Supplement: c5ra27062f1.pdf [file c5ra27062f1.pdf]

## Supporting information

### Biorefining of *Eruca sativa* plant for efficient biofuel production

Hamed Bateni<sup>1,2\*</sup>, Keikhosro Karimi<sup>1,3\*\*</sup>

<sup>1</sup> Department of Chemical Engineering, Isfahan University of Technology,

Isfahan 84156-83111, Iran

<sup>2</sup> Chemical and Biomolecular Engineering Department, Ohio University, Athens, OH 45701,

United States

<sup>3</sup> Industrial Biotechnology Group, Institute of Biotechnology and Bioengineering, Isfahan

University of Technology, Isfahan 84156-83111, Iran

\*Corresponding authors:

Tel: +1 7405925650

Fax: +1 7405930873

E-mail: hamed.bateni@gmail.com; hb683413@ohio.edu

\*\*Corresponding author:

Tel: +98 3113915623

Fax: +98 3113912677

E-mail: karimi@cc.iut.ac.ir

All data sets were analyzed using ANOVA toolbox of Microsoft Office Excel 2013. The most important analysis of variance (ANOVA) results including esterification, transesterification, ethanol production, biogas production, and ethanol extractive content of the seed cake were presented in the following tables. The 2-factors ANOVA was used for both esterification and transesterification results while single factor ANOVA was utilized for remaining experiments. The p-values less than 0.05 were considered as statistically significant.

**Table S1.** Analysis of variance of *Eruca sativa* pretreatment (esterification) using 0.4:1 methanol to oil mass ratio and in the presence of 1% H<sub>2</sub>SO<sub>4</sub> at different temperature and time.

| <i>Source of Variation</i>    | <i>SS</i> | <i>df</i> | <i>MS</i> | <i>F</i> | <i>P-value</i> | <i>F crit</i> |
|-------------------------------|-----------|-----------|-----------|----------|----------------|---------------|
| <b>Sample (Time)</b>          | 735.7875  | 3         | 245.2625  | 985.9799 | 4.21E-43       | 2.798061      |
| <b>Columns (Temperatures)</b> | 395.4875  | 3         | 131.8292  | 529.9665 | 8.91E-37       | 2.798061      |
| <b>Interaction</b>            | 34.9825   | 9         | 3.886944  | 15.62591 | 1.62E-11       | 2.08173       |
| <b>Within</b>                 | 11.94     | 48        | 0.24875   |          |                |               |
| <b>Total</b>                  | 1178.198  | 63        |           |          |                |               |

**Table S2.** Analysis of variance of the effects of temperature and time on the *Eruca sativa* transesterification using 0.3:1 methanol to oil mass ratio and in the presence of 1.5% KOH.

| <i>Source of Variation</i>   | <i>SS</i> | <i>df</i> | <i>MS</i> | <i>F</i> | <i>P-value</i> | <i>F crit</i> |
|------------------------------|-----------|-----------|-----------|----------|----------------|---------------|
| <b>Sample (Time)</b>         | 25742.3   | 3         | 8580.766  | 9458.285 | 2.26E-93       | 2.731807      |
| <b>Columns (Temperature)</b> | 2831.335  | 5         | 566.267   | 624.1767 | 8.55E-58       | 2.341828      |
| <b>Interaction</b>           | 167.2717  | 15        | 11.15144  | 12.29186 | 2.32E-14       | 1.807571      |
| <b>Within</b>                | 65.32     | 72        | 0.907222  |          |                |               |
| <b>Total</b>                 | 28806.23  | 95        |           |          |                |               |

**Table S3.** Analysis of variance of the effects of methanol to oil mass ratio and time on the *Eruca sativa* transesterification at 60 °C and in the presence of 1.5% KOH.

| <i>Source of Variation</i>        | <i>SS</i> | <i>df</i> | <i>MS</i> | <i>F</i> | <i>P-value</i> | <i>F crit</i> |
|-----------------------------------|-----------|-----------|-----------|----------|----------------|---------------|
| <b>Sample (Time)</b>              | 9082.847  | 3         | 3027.616  | 2729.631 | 1.32E-53       | 2.798061      |
| <b>Columns (Methanol content)</b> | 20864.23  | 3         | 6954.743  | 6270.241 | 3.06E-62       | 2.798061      |
| <b>Interaction</b>                | 1300.023  | 9         | 144.4469  | 130.2302 | 1.31E-30       | 2.08173       |
| <b>Within</b>                     | 53.24     | 48        | 1.109167  |          |                |               |
| <b>Total</b>                      | 31300.34  | 63        |           |          |                |               |

**Table S4.** Analysis of variance of the effects of methanol to oil mass ratio of 0.3:1 and 0.4:1 when transesterification at performed at 60 °C for 90 min and in the presence of 1.5% KOH.

| <i>Source of Variation</i> | <i>SS</i> | <i>df</i> | <i>MS</i> | <i>F</i> | <i>P-value</i> | <i>F crit</i> |
|----------------------------|-----------|-----------|-----------|----------|----------------|---------------|
| <b>Between Groups</b>      | 0.00125   | 1         | 0.00125   | 0.001457 | 0.97079        | 5.987378      |
| <b>Within Groups</b>       | 5.1475    | 6         | 0.857917  |          |                |               |
| <b>Total</b>               | 5.14875   | 7         |           |          |                |               |

**Table S5.** Analysis of variance of ethanol production using untreated and pretreated *Eruca sativa* straw.

| <i>Source of Variation</i> | <i>SS</i> | <i>df</i> | <i>MS</i> | <i>F</i>    | <i>P-value</i> | <i>F crit</i> |
|----------------------------|-----------|-----------|-----------|-------------|----------------|---------------|
| <b>Between Groups</b>      | 5253.112  | 4         | 1313.278  | 796.9725903 | 2.86246E-17    | 3.055568276   |
| <b>Within Groups</b>       | 24.7175   | 15        | 1.647833  |             |                |               |
| <b>Total</b>               | 5277.83   | 19        |           |             |                |               |

**Table S6.** Analysis of variance of ethanol production using untreated and pretreated *Eruca sativa* seed cake.

| <i>Source of Variation</i> | <i>SS</i> | <i>df</i> | <i>MS</i>   | <i>F</i>    | <i>P-value</i> | <i>F crit</i> |
|----------------------------|-----------|-----------|-------------|-------------|----------------|---------------|
| <b>Between Groups</b>      | 4639.025  | 4         | 1159.75625  | 1309.472619 | 7.01488E-19    | 3.055568276   |
| <b>Within Groups</b>       | 13.285    | 15        | 0.885666667 |             |                |               |
| <b>Total</b>               | 4652.31   | 19        |             |             |                |               |

**Table S7.** Analysis of variance of biogas production using untreated and pretreated *Eruca sativa* straw

| <i>Source of Variation</i> | <i>SS</i> | <i>df</i> | <i>MS</i> | <i>F</i> | <i>P-value</i> | <i>F crit</i> |
|----------------------------|-----------|-----------|-----------|----------|----------------|---------------|
| <b>Between Groups</b>      | 44272.04  | 4         | 11068.01  | 1138.079 | 2E-18          | 3.055568      |
| <b>Within Groups</b>       | 145.8775  | 15        | 9.725167  |          |                |               |
| <b>Total</b>               | 44417.92  | 19        |           |          |                |               |

**Table S8.** Analysis of variance of biogas production using untreated and pretreated *Eruca sativa* seed cake.

| <i>Source of Variation</i> | <i>SS</i> | <i>df</i> | <i>MS</i> | <i>F</i> | <i>P-value</i> | <i>F crit</i> |
|----------------------------|-----------|-----------|-----------|----------|----------------|---------------|
| <b>Between Groups</b>      | 23440.75  | 4         | 5860.187  | 276.4761 | 7.47E-14       | 3.055568      |
| <b>Within Groups</b>       | 317.94    | 15        | 21.196    |          |                |               |
| <b>Total</b>               | 23758.69  | 19        |           |          |                |               |

**Table S9.** Analysis of variance of the ethanol extractive content of untreated and pretreated *Eruca sativa* seed cake.

| <i>Source of Variation</i> | <i>SS</i> | <i>df</i> | <i>MS</i> | <i>F</i> | <i>P-value</i> | <i>F crit</i> |
|----------------------------|-----------|-----------|-----------|----------|----------------|---------------|
| <b>Between Groups</b>      | 248.227   | 4         | 62.05675  | 618.5058 | 1.89E-16       | 3.055568      |
| <b>Within Groups</b>       | 1.505     | 15        | 0.100333  |          |                |               |
| <b>Total</b>               | 249.732   | 19        |           |          |                |               |
